# Supplementary material for: Synthesis of dendrimer stabilized high-density silver nanoparticles on reduced graphene oxide for catalytic and antibacterial properties
Source: Royal Society of Chemistry journal article supplement (doi:10.1039/d4ya00284a), 2024-01-01
Supplement: d4ya00284a1.pdf [file d4ya00284a1.pdf]

Supplementary Information

**Synthesis of dendrimer stabilized high-density silver nanoparticles on reduced graphene oxide for the catalytic and antibacterial properties**

Thi Nhat Thang Nguyen,<sup>a</sup> Subodh Kumar<sup>\*b</sup> and Xuan Thang Cao<sup>\*a</sup>

<sup>a</sup>Faculty of Chemical Engineering, Industrial University of Ho Chi Minh City, Vietnam

<sup>b</sup>Department of Inorganic Chemistry, Faculty of Science, Palacký University, Olomouc 779 00, Czech Republic

\*Corresponding Authors

Subodh Kumar E-mail: [subodh.kumar@upol.cz](mailto:subodh.kumar@upol.cz)

Xuan Thang Cao E-mail: [caoxuanthang@iuh.edu.vn](mailto:caoxuanthang@iuh.edu.vn)

Supplementary Information Figures

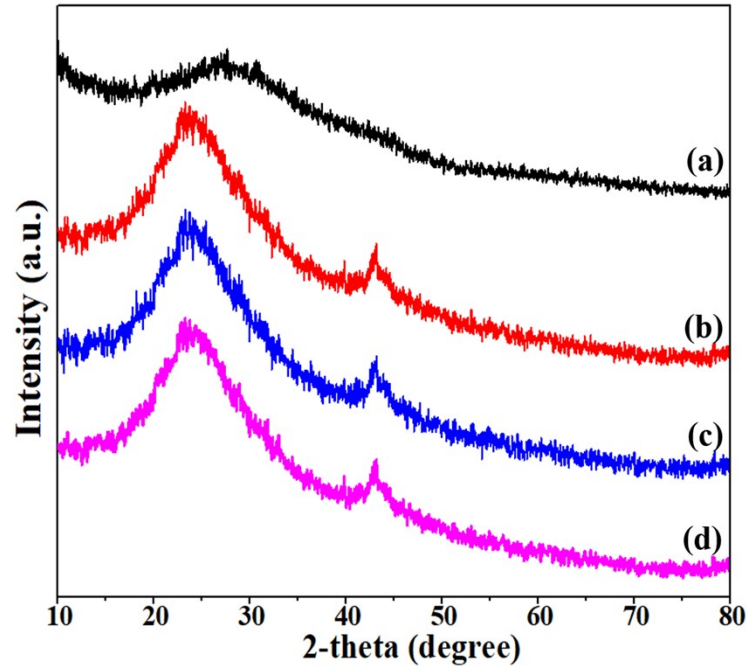

Figure S1. Diffractograms of rGO (a), rGO-PMAAM-G1 (b), rGO-PMAAM-G2 (c), and rGO-PMAAM-G3 (d)

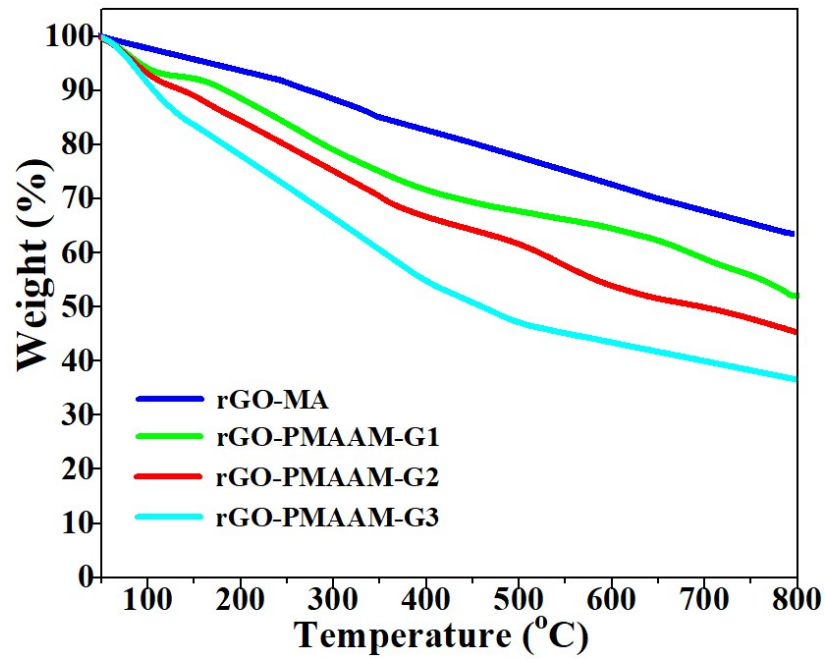

Figure S2. TGA thermal analysis curve of rGO-MA and composites

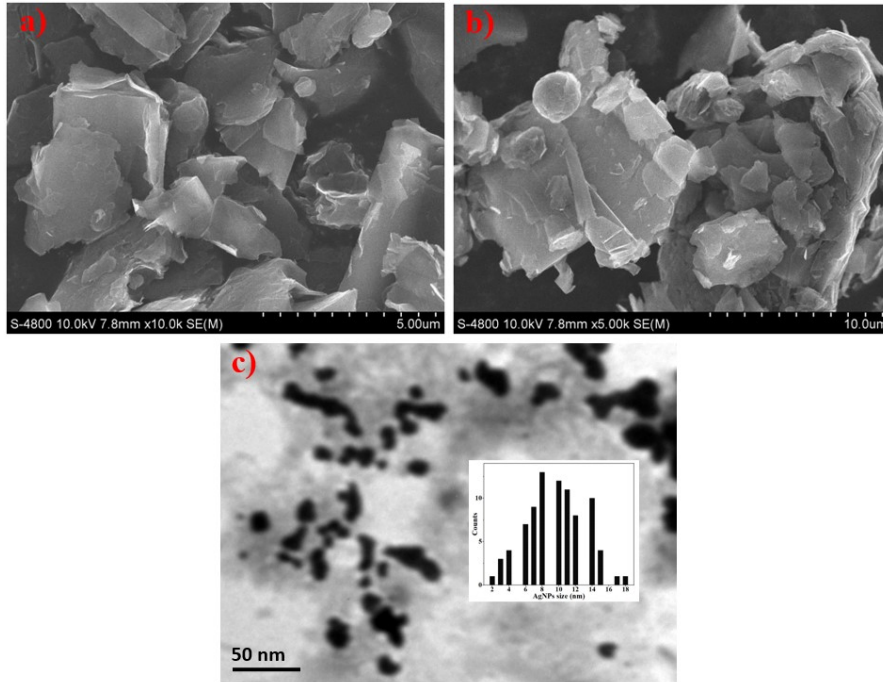

**Figure S3.** SEM (a, b) and TEM (c) results of AgNPs/rGO-PMAAM-G3

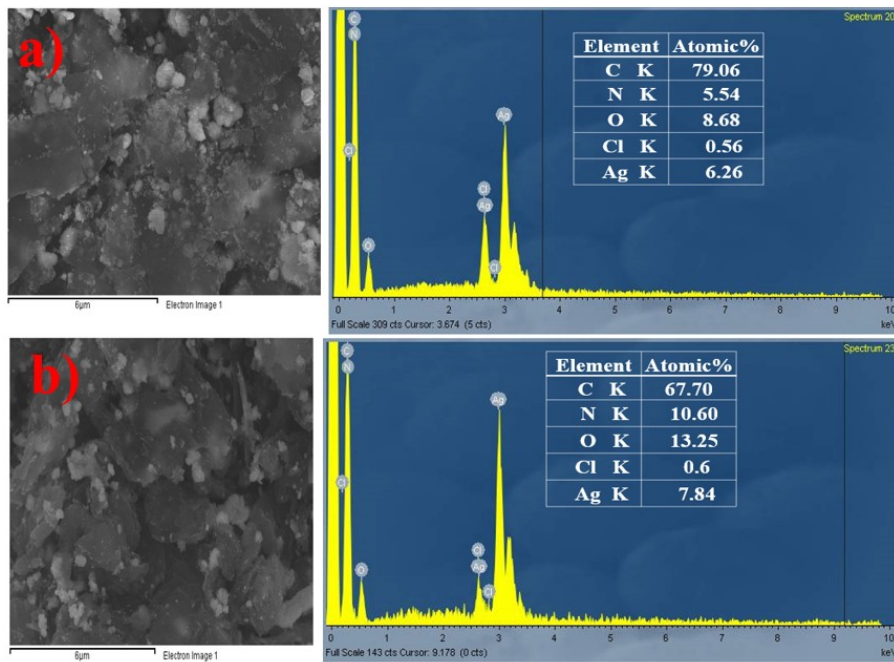

**Figure S4.** SEM-EDX analysis of AgNPs/rGO-PMAAM-G1 (a), AgNPs/rGO-PMAAM-G3 (b)

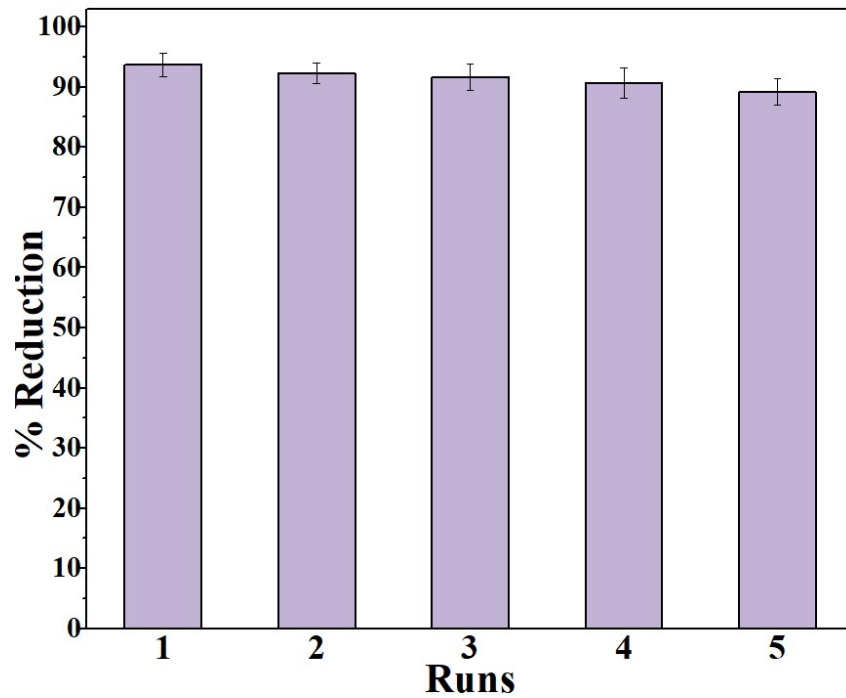

Figure S5. Recyclability of AgNPs/rGO-PMAAM-G3 up to five cycles

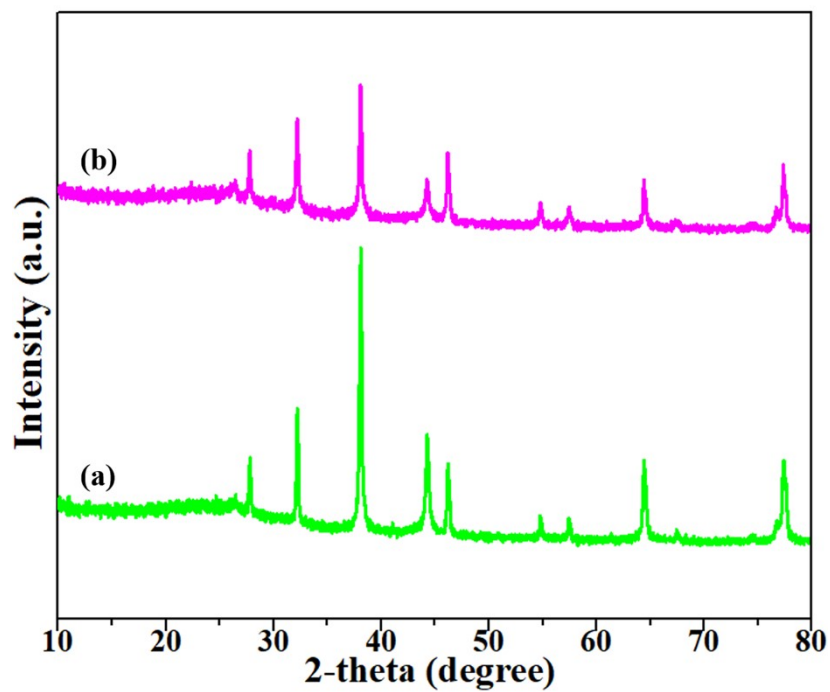

Figure S6. XRD patterns of AgNPs/rGO-PMAAM-G3 fresh (a) and recycled (b) catalyst
